# Supplementary material for: The ETS transcription factor ELF1 regulates a broadly antiviral program distinct from the type I interferon response
Source: PLoS Pathog. 2019 Nov 4;15(11):e1007634. doi: 10.1371/journal.ppat.1007634 (PMC6932815; doi:10.1371/journal.ppat.1007634)
Supplement: S8 Table — (XLSX) [file ppat.1007634.s018.xlsx]

## Sheet: Sheet1
Chr	Start	End	Annotation	Distance To TSS	Gene Name
chr17	38518969	38519401	exon (NM_152219, exon 1 of 1)	1760	GJD3
chr19	45988593	45988834	3' UTR (NM_005619, exon 11 of 11)	7790	RTN2
chr17	25981642	25981932	Intergenic	23613	LGALS9
chr2	220408492	220408769	promoter-TSS (NM_024536)	-98	TMEM198
chr20	43364866	43365175	intron (NR_132377, intron 3 of 4)	-9468	KCNK15
chr7	100231313	100231518	promoter-TSS (NM_001206855)	-142	TFR2
chr8	21867676	21867882	Intergenic	-13842	NPM2
chr16	84457220	84457424	intron (NM_001291454, intron 7 of 23)	17128	ATP2C2
chr19	54672268	54672471	exon (NM_001145303, exon 4 of 15)	4575	TMC4
chr12	71003761	71004037	promoter-TSS (NM_001206971)	-95	PTPRB
chr3	27700794	27700963	Intergenic	63328	EOMES
chr12	29301100	29301251	promoter-TSS (NM_001271783)	-761	FAR2
chr6	27280505	27280703	promoter-TSS (NM_033482)	-593	POM121L2
chr6	41649824	41650023	Intergenic	43728	MDFI
chr3	169755697	169755864	promoter-TSS (NM_014373)	45	GPR160
chr19	51520116	51520288	intron (NM_001077500, intron 3 of 5)	2752	KLK10
chr22	42093215	42093419	3' UTR (NM_001142964, exon 2 of 2)	-2201	MEI1
chr20	43367538	43367722	intron (NR_132377, intron 1 of 4)	-6858	KCNK15
chr19	13507535	13507726	intron (NM_000068, intron 3 of 46)	109644	CACNA1A
chr19	5564109	5564272	intron (NR_027064, intron 1 of 2)	3855	TINCR
chr19	35739463	35739661	promoter-TSS (NM_205835)	3	LSR
chr12	121078243	121078397	promoter-TSS (NM_001033677)	-102	CABP1
chr11	44749500	44749669	Intergenic	-36392	TSPAN18
chr3	5067977	5068378	Intergenic	-46531	BHLHE40-AS1
chr19	51198582	51198875	intron (NM_016148, intron 15 of 23)	24312	SHANK1
chr17	38527576	38527755	Intergenic	-6720	GJD3
chr22	42840094	42840302	Intergenic	-11797	NFAM1
chr15	68870204	68870372	intron (NM_001324014, intron 2 of 12)	-1020	CORO2B
chr17	40440374	40440596	5' UTR (NM_001288718, exon 1 of 19)	411	STAT5A
chr19	49105652	49105827	intron (NM_017708, intron 4 of 4)	-4261	SPACA4
chr9	133003016	133003174	Intergenic	-25063	HMCN2
chr6	35744353	35744531	promoter-TSS (NM_207409)	71	CLPSL2
chr2	128145562	128145845	Intergenic	-30293	PROC
chr3	5028640	5028822	Intergenic	-7085	BHLHE40-AS1
chr7	100806635	100806783	exon (NM_003378, exon 2 of 2)	2143	VGF
chr15	68851934	68852100	intron (NM_001324014, intron 2 of 12)	-19291	CORO2B
chr6	32164211	32164413	intron (NM_004557, intron 28 of 29).4	-1012	GPSM3
chr19	46000356	46000539	promoter-TSS (NM_005619)	-134	RTN2
chr3	27674762	27674923	Intergenic	89364	EOMES
chr7	100808834	100809005	promoter-TSS (NM_003378)	-67	VGF
chr1	189566345	189566463	Intergenic	878736	BRINP3
chr16	56691548	56691720	promoter-TSS (NM_005949)	-221	MT1F
chr14	74058696	74058846	exon (NM_152331, exon 1 of 3)	361	ACOT4
chr4	84309497	84309648	Intergenic	-53266	HPSE
chr2	171674943	171675099	intron (NM_013445, intron 1 of 6)	1821	GAD1
chr13	31248270	31248436	Intergenic	-39262	ALOX5AP
chr9	95571452	95571615	promoter-TSS (NR_026868)	-360	ANKRD19P
chr8	21441106	21441233	Intergenic	205177	GFRA2
chr7	132242536	132242647	intron (NM_181775, intron 2 of 4)	18732	PLXNA4
chr7	95424379	95424510	intron (NM_004411, intron 1 of 16)	22626	DYNC1I1
chr5	176237927	176238091	intron (NM_133369, intron 1 of 14)	449	UNC5A
chr14	74058981	74059143	exon (NM_152331, exon 1 of 3)	652	ACOT4
chr10	135149443	135149594	intron (NM_001321617, intron 1 of 5)	957	CALY
chr12	52316601	52316741	3' UTR (NM_001077401, exon 9 of 9)	10558	ACVRL1
chr17	25878879	25879028	intron (NM_014238, intron 3 of 20)	-79221	LGALS9
chr12	15105287	15105411	intron (NM_001175, intron 1 of 5)	-1264	ARHGDIB
chr16	87669197	87669324	intron (NM_020655, intron 1 of 4)	32767	JPH3
chr14	63670883	63670994	promoter-TSS (NM_020663)	-164	RHOJ
chr17	45331547	45331780	intron (NM_000212, intron 1 of 14)	455	ITGB3
chr11	30607861	30608007	promoter-TSS (NM_001145399)	-4	MPPED2
chr12	94496086	94496212	Intergenic	-46350	PLXNC1
chr7	100227088	100227208	intron (NM_003227, intron 9 of 17)	4125	TFR2
chr12	2162192	2162327	promoter-TSS (NM_001167625)	-157	CACNA1C
chr5	126565247	126565362	Intergenic	-61152	MEGF10
chr19	49118244	49118393	TTS (NM_001270490)	-1624	FAM83E
chr19	51059684	51059923	intron (NM_001080457, intron 1 of 2)	-5504	LRRC4B
chr3	113557591	113557704	promoter-TSS (NM_017577)	-34	GRAMD1C
chr17	53685099	53685217	Intergenic	115067	TMEM100
chr12	94651851	94651986	intron (NM_005761, intron 17 of 30)	-4379	PLXNC1
chr12	48290568	48290675	intron (NM_000376, intron 1 of 9)	8193	VDR
chr6	6008914	6009024	Intergenic	-1131	NRN1
chr16	84404023	84404154	intron (NM_014861, intron 1 of 26)	1959	ATP2C2
chr12	70082902	70083147	promoter-TSS (NR_104220)	33	BEST3
chr13	114482446	114482558	intron (NM_001348663, intron 3 of 7)	20286	TMEM255B
chr5	176237401	176237523	promoter-TSS (NM_133369)	-98	UNC5A
chr3	4872952	4873059	intron (NM_001168272, intron 59 of 60)	75181	BHLHE40-AS1
chr7	150453438	150453554	Intergenic	19060	GIMAP5
chr1	152080544	152080697	exon (NM_007113, exon 3 of 3)	7310	TCHH
chr16	2391030	2391179	promoter-TSS (NM_001089)	181	ABCA17P
chr19	35738867	35739006	promoter-TSS (NM_205835)	-623	LSR
chr4	84255987	84256192	promoter-TSS (NM_001199830)	-55	HPSE
chr3	27763801	27763954	5' UTR (NM_005442, exon 1 of 6)	329	EOMES
chrX	71526864	71526971	promoter-TSS (NM_004143)	-80	CITED1
chr17	38519557	38519666	exon (NM_152219, exon 1 of 1)	1334	GJD3
chr15	89437596	89437707	intron (NM_001307952, intron 1 of 5)	1206	HAPLN3
chr7	95401804	95401934	promoter-TSS (NM_001135557)	51	DYNC1I1
chr6	147525708	147525853	promoter-TSS (NR_034115)	-30	STXBP5-AS1
chr5	173449715	173449861	Intergenic	-22819	NSG2
chr3	169487318	169487481	5' UTR (NM_032487, exon 1 of 2)	284	ACTRT3
chr10	135148985	135149097	intron (NM_001321617, intron 1 of 5)	1434	CALY
